# Supplementary material for: Carotta: Revealing Hidden Confounder Markers in Metabolic Breath Profiles
Source: Metabolites. 2015 Jun 10;5(2):344–63. doi: 10.3390/metabo5020344 (PMC4495376; doi:10.3390/metabo5020344)
Supplement: Supplementary File 1 [file metabolites-05-00344-s001.zip]

Archive with 10 entries (8 files):
- metabolites-80755-supplementary-final/
- metabolites-80755-supplementary-final/figures/
- metabolites-80755-supplementary-final/figures/fmeasureCOPDALL.png
- metabolites-80755-supplementary-final/mdpi.cls
- metabolites-80755-supplementary-final/metabolites-80755-supplementary-final.aux
- metabolites-80755-supplementary-final/metabolites-80755-supplementary-final.log
- metabolites-80755-supplementary-final/metabolites-80755-supplementary-final.out
- metabolites-80755-supplementary-final/metabolites-80755-supplementary-final.pdf
- metabolites-80755-supplementary-final/metabolites-80755-supplementary-final.synctex.gz
- metabolites-80755-supplementary-final/metabolites-80755-supplementary-final.tex
