# Supplementary material for: Carotta: Revealing Hidden Confounder Markers in Metabolic Breath Profiles
Source: Metabolites. 2015 Jun 10;5(2):344–63. doi: 10.3390/metabo5020344 (PMC4495376; doi:10.3390/metabo5020344)
Supplement: Supplementary File 1 [file metabolites-05-00344-s001.zip › metabolites-80755-supplementary-final/metabolites-80755-supplementary-final.aux]

\relax 
\providecommand\HyperFirstAtBeginDocument{\AtBeginDocument}
\HyperFirstAtBeginDocument{\ifx\hyper@anchor\@undefined
\global\let\oldcontentsline\contentsline
\gdef\contentsline#1#2#3#4{\oldcontentsline{#1}{#2}{#3}}
\global\let\oldnewlabel\newlabel
\gdef\newlabel#1#2{\newlabelxx{#1}#2}
\gdef\newlabelxx#1#2#3#4#5#6{\oldnewlabel{#1}{{#2}{#3}}}
\AtEndDocument{\ifx\hyper@anchor\@undefined
\let\contentsline\oldcontentsline
\let\newlabel\oldnewlabel
\fi}
\fi}
\global\let\hyper@last\relax 
\gdef\HyperFirstAtBeginDocument#1{#1}
\providecommand\HyField@AuxAddToFields[1]{}
\@writefile{toc}{\contentsline {section}{\numberline {1}Artificial Data Set Generation}{1}{section.1}}
\@writefile{lot}{\contentsline {table}{\numberline {S1}{\ignorespaces Distribution of metabolite expression mean intensities and their variance (standard deviation) for artificial patients with class label ``Health''.\relax }}{1}{table.1}}
\providecommand*\caption@xref[2]{\@setref\relax\@undefined{#1}}
\newlabel{tab:health}{{S1}{1}{Distribution of metabolite expression mean intensities and their variance (standard deviation) for artificial patients with class label ``Health''.\relax \relax }{table.1}{}}
\@writefile{lot}{\contentsline {table}{\numberline {S2}{\ignorespaces Distribution of metabolite expression mean intensities and their variance (standard deviation) for artificial patients with class label ``Nutrition''.\relax }}{1}{table.2}}
\newlabel{tab:nutrition}{{S2}{1}{Distribution of metabolite expression mean intensities and their variance (standard deviation) for artificial patients with class label ``Nutrition''.\relax \relax }{table.2}{}}
\@writefile{lot}{\contentsline {table}{\numberline {S3}{\ignorespaces Distribution of metabolite expression mean intensities and their variance (standard deviation) for artificial patients with class label ``Smoking''.\relax }}{1}{table.3}}
\newlabel{tab:smoker}{{S3}{1}{Distribution of metabolite expression mean intensities and their variance (standard deviation) for artificial patients with class label ``Smoking''.\relax \relax }{table.3}{}}
\@writefile{toc}{\contentsline {section}{\numberline {2}Agglomerative Methods for HAC}{2}{section.2}}
\@writefile{toc}{\contentsline {section}{\numberline {3}F-Measure of the 14 Metabolite Subsets in the COPD Data Set}{2}{section.3}}
\@writefile{lof}{\contentsline {figure}{\numberline {S1}{\ignorespaces Comparison of the clustering results of the 14 metabolite clusters. The plot shows the F-measure for different clustering thresholds computed against the disease annotation (COPD, COPD with BC, and healthy). Given three groups of patients in the annotation, we are particularly interested in the performance at clustering results at $T\nobreakspace  {}3$ (x-axis).\relax }}{2}{figure.1}}
\newlabel{fig:fmeasureCOPD}{{S1}{2}{Comparison of the clustering results of the 14 metabolite clusters. The plot shows the F-measure for different clustering thresholds computed against the disease annotation (COPD, COPD with BC, and healthy). Given three groups of patients in the annotation, we are particularly interested in the performance at clustering results at $T~3$ (x-axis).\relax \relax }{figure.1}{}}
\newlabel{LastPage}{{}{2}{}{page.2}{}}
\xdef\lastpage@lastpage{2}
\xdef\lastpage@lastpageHy{2}
