# Supplementary material for: Carotta: Revealing Hidden Confounder Markers in Metabolic Breath Profiles
Source: Metabolites. 2015 Jun 10;5(2):344–63. doi: 10.3390/metabo5020344 (PMC4495376; doi:10.3390/metabo5020344)
Supplement: Supplementary File 1 [file metabolites-05-00344-s001.zip › metabolites-80755-supplementary-final/metabolites-80755-supplementary-final.log]

This is pdfTeX, Version 3.1415926-2.4-1.40.13 (TeX Live 2012/W32TeX) (format=pdflatex 2013.9.24)  10 JUN 2015 10:42
entering extended mode
 restricted \write18 enabled.
 %&-line parsing enabled.
**metabolites-80755-supplementary-final.tex
(./metabolites-80755-supplementary-final.tex
LaTeX2e <2011/06/27>
Babel <v3.8m> and hyphenation patterns for english, dumylang, nohyphenation, ge
rman-x-2012-05-30, ngerman-x-2012-05-30, afrikaans, ancientgreek, ibycus, arabi
c, armenian, basque, bulgarian, catalan, pinyin, coptic, croatian, czech, danis
h, dutch, ukenglish, usenglishmax, esperanto, estonian, ethiopic, farsi, finnis
h, french, friulan, galician, german, ngerman, swissgerman, monogreek, greek, h
ungarian, icelandic, assamese, bengali, gujarati, hindi, kannada, malayalam, ma
rathi, oriya, panjabi, tamil, telugu, indonesian, interlingua, irish, italian, 
kurmanji, latin, latvian, lithuanian, mongolian, mongolianlmc, bokmal, nynorsk,
 polish, portuguese, romanian, romansh, russian, sanskrit, serbian, serbianc, s
lovak, slovenian, spanish, swedish, turkish, turkmen, ukrainian, uppersorbian, 
welsh, loaded.
(./mdpi.cls
Document Class: mdpi 2012/07/02 MDPI paper class

Class mdpi Warning: You have not specified the journal. The first class option 
of the document class mdpi specify the journal. The word journal should be repl
aced by one of the following journal names: actuators, administrativesciences, 
agriculture, agronomy, algorithms, animals, antibodies, antioxidants, antiviral
s, appliedsciences, atmosphere, atoms, axioms, behavioralsciences, biology, bio
medicines, biomolecules, biosensors, brainsciences, buildings, cancers, catalys
ts, cells, challenges, chemosensors, children, chromatography, climate, coating
s, computers, crystals, diversity, education, electronics, energies, entropy, f
ibers, forests, futureinternet, galaxies, games, genes, geosciences, humanities
, information, insects, ijerph, ijgi, ijms, laws, life, lubricants, marinedrugs
, materials, membranes, metabolites, metals, microarrays, micromachines, minera
ls, molbank, molecules, nanomaterials, nutrients, pathogens, pharmaceuticals, p
harmaceutics , plants, polymers, religions, remotesensing, resources, robotics,
 sensors, socialsciences, societies, sustainability, symmetry, systems, technol
ogies, toxins, vaccines, viruses, water on input line 229.

(c:/texlive/2012/texmf-dist/tex/latex/base/article.cls
Document Class: article 2007/10/19 v1.4h Standard LaTeX document class
(c:/texlive/2012/texmf-dist/tex/latex/base/size12.clo
File: size12.clo 2007/10/19 v1.4h Standard LaTeX file (size option)
)
\c@part=\count79
\c@section=\count80
\c@subsection=\count81
\c@subsubsection=\count82
\c@paragraph=\count83
\c@subparagraph=\count84
\c@figure=\count85
\c@table=\count86
\abovecaptionskip=\skip41
\belowcaptionskip=\skip42
\bibindent=\dimen102
)
(c:/texlive/2012/texmf-dist/tex/latex/tools/calc.sty
Package: calc 2007/08/22 v4.3 Infix arithmetic (KKT,FJ)
\calc@Acount=\count87
\calc@Bcount=\count88
\calc@Adimen=\dimen103
\calc@Bdimen=\dimen104
\calc@Askip=\skip43
\calc@Bskip=\skip44
LaTeX Info: Redefining \setlength on input line 76.
LaTeX Info: Redefining \addtolength on input line 77.
\calc@Ccount=\count89
\calc@Cskip=\skip45
)
(c:/texlive/2012/texmf-dist/tex/latex/tools/indentfirst.sty
Package: indentfirst 1995/11/23 v1.03 Indent first paragraph (DPC)
)
(c:/texlive/2012/texmf-dist/tex/latex/psnfss/times.sty
Package: times 2005/04/12 PSNFSS-v9.2a (SPQR) 
)
(c:/texlive/2012/texmf-dist/tex/latex/fancyhdr/fancyhdr.sty
\fancy@headwidth=\skip46
\f@ncyO@elh=\skip47
\f@ncyO@erh=\skip48
\f@ncyO@olh=\skip49
\f@ncyO@orh=\skip50
\f@ncyO@elf=\skip51
\f@ncyO@erf=\skip52
\f@ncyO@olf=\skip53
\f@ncyO@orf=\skip54
)
(c:/texlive/2012/texmf-dist/tex/latex/graphics/graphicx.sty
Package: graphicx 1999/02/16 v1.0f Enhanced LaTeX Graphics (DPC,SPQR)

(c:/texlive/2012/texmf-dist/tex/latex/graphics/keyval.sty
Package: keyval 1999/03/16 v1.13 key=value parser (DPC)
\KV@toks@=\toks14
)
(c:/texlive/2012/texmf-dist/tex/latex/graphics/graphics.sty
Package: graphics 2009/02/05 v1.0o Standard LaTeX Graphics (DPC,SPQR)

(c:/texlive/2012/texmf-dist/tex/latex/graphics/trig.sty
Package: trig 1999/03/16 v1.09 sin cos tan (DPC)
)
(c:/texlive/2012/texmf-dist/tex/latex/latexconfig/graphics.cfg
File: graphics.cfg 2010/04/23 v1.9 graphics configuration of TeX Live
)
Package graphics Info: Driver file: pdftex.def on input line 91.

(c:/texlive/2012/texmf-dist/tex/latex/pdftex-def/pdftex.def
File: pdftex.def 2011/05/27 v0.06d Graphics/color for pdfTeX

(c:/texlive/2012/texmf-dist/tex/generic/oberdiek/infwarerr.sty
Package: infwarerr 2010/04/08 v1.3 Providing info/warning/error messages (HO)
)
(c:/texlive/2012/texmf-dist/tex/generic/oberdiek/ltxcmds.sty
Package: ltxcmds 2011/11/09 v1.22 LaTeX kernel commands for general use (HO)
)
\Gread@gobject=\count90
))
\Gin@req@height=\dimen105
\Gin@req@width=\dimen106
)
(c:/texlive/2012/texmf-dist/tex/latex/lastpage/lastpage.sty
Package: lastpage 2011/09/01 v1.2k Refers to last page's name (HMM; JPG)
)
(c:/texlive/2012/texmf-dist/tex/latex/base/ifthen.sty
Package: ifthen 2001/05/26 v1.1c Standard LaTeX ifthen package (DPC)
)
(c:/texlive/2012/texmf-dist/tex/latex/lineno/lineno.sty
Package: lineno 2005/11/02 line numbers on paragraphs v4.41
\linenopenalty=\count91
\output=\toks15
\linenoprevgraf=\count92
\linenumbersep=\dimen107
\linenumberwidth=\dimen108
\c@linenumber=\count93
\c@pagewiselinenumber=\count94
\c@LN@truepage=\count95
\c@internallinenumber=\count96
\c@internallinenumbers=\count97
\quotelinenumbersep=\dimen109
\bframerule=\dimen110
\bframesep=\dimen111
\bframebox=\box26
LaTeX Info: Redefining \\ on input line 3056.
)
(c:/texlive/2012/texmf-dist/tex/latex/float/float.sty
Package: float 2001/11/08 v1.3d Float enhancements (AL)
\c@float@type=\count98
\float@exts=\toks16
\float@box=\box27
\@float@everytoks=\toks17
\@floatcapt=\box28
)
\@float@every@figure=\toks18
\@float@every@table=\toks19

(c:/texlive/2012/texmf-dist/tex/latex/caption/caption.sty
Package: caption 2012/02/19 v3.2f Customizing captions (AR)

(c:/texlive/2012/texmf-dist/tex/latex/caption/caption3.sty
Package: caption3 2012/01/12 v1.4b caption3 kernel (AR)
\captionmargin=\dimen112
\captionmargin@=\dimen113
\captionwidth=\dimen114
\caption@indent=\dimen115
\caption@parindent=\dimen116
\caption@hangindent=\dimen117
)
\c@ContinuedFloat=\count99
Package caption Info: float package is loaded.
)
(c:/texlive/2012/texmf-dist/tex/latex/graphics/color.sty
Package: color 2005/11/14 v1.0j Standard LaTeX Color (DPC)

(c:/texlive/2012/texmf-dist/tex/latex/latexconfig/color.cfg
File: color.cfg 2007/01/18 v1.5 color configuration of teTeX/TeXLive
)
Package color Info: Driver file: pdftex.def on input line 130.
)
(c:/texlive/2012/texmf-dist/tex/latex/natbib/natbib.sty
Package: natbib 2010/09/13 8.31b (PWD, AO)
\bibhang=\skip55
\bibsep=\skip56
LaTeX Info: Redefining \cite on input line 694.
\c@NAT@ctr=\count100
)
(c:/texlive/2012/texmf-dist/tex/latex/hyphenat/hyphenat.sty
Package: hyphenat 2009/09/02 v2.3c hyphenation utilities
\langwohyphens=\language76
LaTeX Info: Redefining \_ on input line 43.
)
(c:/texlive/2012/texmf-dist/tex/latex/hyperref/hyperref.sty
Package: hyperref 2012/05/13 v6.82q Hypertext links for LaTeX

(c:/texlive/2012/texmf-dist/tex/generic/oberdiek/hobsub-hyperref.sty
Package: hobsub-hyperref 2012/05/28 v1.13 Bundle oberdiek, subset hyperref (HO)


(c:/texlive/2012/texmf-dist/tex/generic/oberdiek/hobsub-generic.sty
Package: hobsub-generic 2012/05/28 v1.13 Bundle oberdiek, subset generic (HO)
Package: hobsub 2012/05/28 v1.13 Construct package bundles (HO)
Package hobsub Info: Skipping package `infwarerr' (already loaded).
Package hobsub Info: Skipping package `ltxcmds' (already loaded).
Package: ifluatex 2010/03/01 v1.3 Provides the ifluatex switch (HO)
Package ifluatex Info: LuaTeX not detected.
Package: ifvtex 2010/03/01 v1.5 Detect VTeX and its facilities (HO)
Package ifvtex Info: VTeX not detected.
Package: intcalc 2007/09/27 v1.1 Expandable calculations with integers (HO)
Package: ifpdf 2011/01/30 v2.3 Provides the ifpdf switch (HO)
Package ifpdf Info: pdfTeX in PDF mode is detected.
Package: etexcmds 2011/02/16 v1.5 Avoid name clashes with e-TeX commands (HO)
Package etexcmds Info: Could not find \expanded.
(etexcmds)             That can mean that you are not using pdfTeX 1.50 or
(etexcmds)             that some package has redefined \expanded.
(etexcmds)             In the latter case, load this package earlier.
Package: kvsetkeys 2012/04/25 v1.16 Key value parser (HO)
Package: kvdefinekeys 2011/04/07 v1.3 Define keys (HO)
Package: pdftexcmds 2011/11/29 v0.20 Utility functions of pdfTeX for LuaTeX (HO
)
Package pdftexcmds Info: LuaTeX not detected.
Package pdftexcmds Info: \pdf@primitive is available.
Package pdftexcmds Info: \pdf@ifprimitive is available.
Package pdftexcmds Info: \pdfdraftmode found.
Package: pdfescape 2011/11/25 v1.13 Implements pdfTeX's escape features (HO)
Package: bigintcalc 2012/04/08 v1.3 Expandable calculations on big integers (HO
)
Package: bitset 2011/01/30 v1.1 Handle bit-vector datatype (HO)
Package: uniquecounter 2011/01/30 v1.2 Provide unlimited unique counter (HO)
)
Package hobsub Info: Skipping package `hobsub' (already loaded).
Package: letltxmacro 2010/09/02 v1.4 Let assignment for LaTeX macros (HO)
Package: hopatch 2012/05/28 v1.2 Wrapper for package hooks (HO)
Package: xcolor-patch 2011/01/30 xcolor patch
Package: atveryend 2011/06/30 v1.8 Hooks at the very end of document (HO)
Package atveryend Info: \enddocument detected (standard20110627).
Package: atbegshi 2011/10/05 v1.16 At begin shipout hook (HO)
Package: refcount 2011/10/16 v3.4 Data extraction from label references (HO)
Package: hycolor 2011/01/30 v1.7 Color options for hyperref/bookmark (HO)
)
(c:/texlive/2012/texmf-dist/tex/generic/ifxetex/ifxetex.sty
Package: ifxetex 2010/09/12 v0.6 Provides ifxetex conditional
)
(c:/texlive/2012/texmf-dist/tex/latex/oberdiek/kvoptions.sty
Package: kvoptions 2011/06/30 v3.11 Key value format for package options (HO)
)
\@linkdim=\dimen118
\Hy@linkcounter=\count101
\Hy@pagecounter=\count102

(c:/texlive/2012/texmf-dist/tex/latex/hyperref/pd1enc.def
File: pd1enc.def 2012/05/13 v6.82q Hyperref: PDFDocEncoding definition (HO)
)
\Hy@SavedSpaceFactor=\count103

(c:/texlive/2012/texmf-dist/tex/latex/latexconfig/hyperref.cfg
File: hyperref.cfg 2002/06/06 v1.2 hyperref configuration of TeXLive
)
Package hyperref Info: Option `unicode' set `false' on input line 3941.
Package hyperref Info: Option `pdftoolbar' set `true' on input line 3941.
Package hyperref Info: Option `pdfmenubar' set `true' on input line 3941.
Package hyperref Info: Option `bookmarksopen' set `true' on input line 3941.
Package hyperref Info: Option `pdffitwindow' set `true' on input line 3941.
Package hyperref Info: Option `pdfnewwindow' set `true' on input line 3941.
Package hyperref Info: Option `colorlinks' set `true' on input line 3941.
Package hyperref Info: Hyper figures OFF on input line 4062.
Package hyperref Info: Link nesting OFF on input line 4067.
Package hyperref Info: Hyper index ON on input line 4070.
Package hyperref Info: Plain pages OFF on input line 4077.
Package hyperref Info: Backreferencing OFF on input line 4082.
Package hyperref Info: Implicit mode ON; LaTeX internals redefined.
Package hyperref Info: Bookmarks ON on input line 4300.
\c@Hy@tempcnt=\count104

(c:/texlive/2012/texmf-dist/tex/latex/url/url.sty
\Urlmuskip=\muskip10
Package: url 2006/04/12  ver 3.3  Verb mode for urls, etc.
)
LaTeX Info: Redefining \url on input line 4653.
\Fld@menulength=\count105
\Field@Width=\dimen119
\Fld@charsize=\dimen120
Package hyperref Info: Hyper figures OFF on input line 5773.
Package hyperref Info: Link nesting OFF on input line 5778.
Package hyperref Info: Hyper index ON on input line 5781.
Package hyperref Info: backreferencing OFF on input line 5788.
Package hyperref Info: Link coloring ON on input line 5791.
Package hyperref Info: Link coloring with OCG OFF on input line 5798.
Package hyperref Info: PDF/A mode OFF on input line 5803.
LaTeX Info: Redefining \ref on input line 5843.
LaTeX Info: Redefining \pageref on input line 5847.
\Hy@abspage=\count106
\c@Item=\count107
\c@Hfootnote=\count108
)

Package hyperref Message: Driver: hpdftex.

(c:/texlive/2012/texmf-dist/tex/latex/hyperref/hpdftex.def
File: hpdftex.def 2012/05/13 v6.82q Hyperref driver for pdfTeX
\Fld@listcount=\count109
\c@bookmark@seq@number=\count110

(c:/texlive/2012/texmf-dist/tex/latex/oberdiek/rerunfilecheck.sty
Package: rerunfilecheck 2011/04/15 v1.7 Rerun checks for auxiliary files (HO)
Package uniquecounter Info: New unique counter `rerunfilecheck' on input line 2
82.
)
\Hy@SectionHShift=\skip57
))
(c:/texlive/2012/texmf-dist/tex/latex/amsfonts/amssymb.sty
Package: amssymb 2009/06/22 v3.00

(c:/texlive/2012/texmf-dist/tex/latex/amsfonts/amsfonts.sty
Package: amsfonts 2009/06/22 v3.00 Basic AMSFonts support
\@emptytoks=\toks20
\symAMSa=\mathgroup4
\symAMSb=\mathgroup5
LaTeX Font Info:    Overwriting math alphabet `\mathfrak' in version `bold'
(Font)                  U/euf/m/n --> U/euf/b/n on input line 96.
))
(c:/texlive/2012/texmf-dist/tex/latex/amsmath/amsmath.sty
Package: amsmath 2000/07/18 v2.13 AMS math features
\@mathmargin=\skip58

For additional information on amsmath, use the `?' option.
(c:/texlive/2012/texmf-dist/tex/latex/amsmath/amstext.sty
Package: amstext 2000/06/29 v2.01

(c:/texlive/2012/texmf-dist/tex/latex/amsmath/amsgen.sty
File: amsgen.sty 1999/11/30 v2.0
\@emptytoks=\toks21
\ex@=\dimen121
))
(c:/texlive/2012/texmf-dist/tex/latex/amsmath/amsbsy.sty
Package: amsbsy 1999/11/29 v1.2d
\pmbraise@=\dimen122
)
(c:/texlive/2012/texmf-dist/tex/latex/amsmath/amsopn.sty
Package: amsopn 1999/12/14 v2.01 operator names
)
\inf@bad=\count111
LaTeX Info: Redefining \frac on input line 211.
\uproot@=\count112
\leftroot@=\count113
LaTeX Info: Redefining \overline on input line 307.
\classnum@=\count114
\DOTSCASE@=\count115
LaTeX Info: Redefining \ldots on input line 379.
LaTeX Info: Redefining \dots on input line 382.
LaTeX Info: Redefining \cdots on input line 467.
\Mathstrutbox@=\box29
\strutbox@=\box30
\big@size=\dimen123
LaTeX Font Info:    Redeclaring font encoding OML on input line 567.
LaTeX Font Info:    Redeclaring font encoding OMS on input line 568.
\macc@depth=\count116
\c@MaxMatrixCols=\count117
\dotsspace@=\muskip11
\c@parentequation=\count118
\dspbrk@lvl=\count119
\tag@help=\toks22
\row@=\count120
\column@=\count121
\maxfields@=\count122
\andhelp@=\toks23
\eqnshift@=\dimen124
\alignsep@=\dimen125
\tagshift@=\dimen126
\tagwidth@=\dimen127
\totwidth@=\dimen128
\lineht@=\dimen129
\@envbody=\toks24
\multlinegap=\skip59
\multlinetaggap=\skip60
\mathdisplay@stack=\toks25
LaTeX Info: Redefining \[ on input line 2666.
LaTeX Info: Redefining \] on input line 2667.
)
(c:/texlive/2012/texmf-dist/tex/latex/graphics/epsfig.sty
Package: epsfig 1999/02/16 v1.7a (e)psfig emulation (SPQR)
\epsfxsize=\dimen130
\epsfysize=\dimen131
)
(c:/texlive/2012/texmf-dist/tex/latex/rotating/rotating.sty
Package: rotating 2009/03/28 v2.16a rotated objects in LaTeX
\c@r@tfl@t=\count123
\rotFPtop=\skip61
\rotFPbot=\skip62
\rot@float@box=\box31
\rot@mess@toks=\toks26
)
(c:/texlive/2012/texmf-dist/tex/latex/multirow/multirow.sty
\bigstrutjot=\dimen132
)
(c:/texlive/2012/texmf-dist/tex/latex/booktabs/booktabs.sty
Package: booktabs 2005/04/14 v1.61803 publication quality tables
\heavyrulewidth=\dimen133
\lightrulewidth=\dimen134
\cmidrulewidth=\dimen135
\belowrulesep=\dimen136
\belowbottomsep=\dimen137
\aboverulesep=\dimen138
\abovetopsep=\dimen139
\cmidrulesep=\dimen140
\cmidrulekern=\dimen141
\defaultaddspace=\dimen142
\@cmidla=\count124
\@cmidlb=\count125
\@aboverulesep=\dimen143
\@belowrulesep=\dimen144
\@thisruleclass=\count126
\@lastruleclass=\count127
\@thisrulewidth=\dimen145
)
(c:/texlive/2012/texmf-dist/tex/latex/base/inputenc.sty
Package: inputenc 2008/03/30 v1.1d Input encoding file
\inpenc@prehook=\toks27
\inpenc@posthook=\toks28

(c:/texlive/2012/texmf-dist/tex/latex/base/utf8.def
File: utf8.def 2008/04/05 v1.1m UTF-8 support for inputenc
Now handling font encoding OML ...
... no UTF-8 mapping file for font encoding OML
Now handling font encoding T1 ...
... processing UTF-8 mapping file for font encoding T1

(c:/texlive/2012/texmf-dist/tex/latex/base/t1enc.dfu
File: t1enc.dfu 2008/04/05 v1.1m UTF-8 support for inputenc
   defining Unicode char U+00A1 (decimal 161)
   defining Unicode char U+00A3 (decimal 163)
   defining Unicode char U+00AB (decimal 171)
   defining Unicode char U+00BB (decimal 187)
   defining Unicode char U+00BF (decimal 191)
   defining Unicode char U+00C0 (decimal 192)
   defining Unicode char U+00C1 (decimal 193)
   defining Unicode char U+00C2 (decimal 194)
   defining Unicode char U+00C3 (decimal 195)
   defining Unicode char U+00C4 (decimal 196)
   defining Unicode char U+00C5 (decimal 197)
   defining Unicode char U+00C6 (decimal 198)
   defining Unicode char U+00C7 (decimal 199)
   defining Unicode char U+00C8 (decimal 200)
   defining Unicode char U+00C9 (decimal 201)
   defining Unicode char U+00CA (decimal 202)
   defining Unicode char U+00CB (decimal 203)
   defining Unicode char U+00CC (decimal 204)
   defining Unicode char U+00CD (decimal 205)
   defining Unicode char U+00CE (decimal 206)
   defining Unicode char U+00CF (decimal 207)
   defining Unicode char U+00D0 (decimal 208)
   defining Unicode char U+00D1 (decimal 209)
   defining Unicode char U+00D2 (decimal 210)
   defining Unicode char U+00D3 (decimal 211)
   defining Unicode char U+00D4 (decimal 212)
   defining Unicode char U+00D5 (decimal 213)
   defining Unicode char U+00D6 (decimal 214)
   defining Unicode char U+00D8 (decimal 216)
   defining Unicode char U+00D9 (decimal 217)
   defining Unicode char U+00DA (decimal 218)
   defining Unicode char U+00DB (decimal 219)
   defining Unicode char U+00DC (decimal 220)
   defining Unicode char U+00DD (decimal 221)
   defining Unicode char U+00DE (decimal 222)
   defining Unicode char U+00DF (decimal 223)
   defining Unicode char U+00E0 (decimal 224)
   defining Unicode char U+00E1 (decimal 225)
   defining Unicode char U+00E2 (decimal 226)
   defining Unicode char U+00E3 (decimal 227)
   defining Unicode char U+00E4 (decimal 228)
   defining Unicode char U+00E5 (decimal 229)
   defining Unicode char U+00E6 (decimal 230)
   defining Unicode char U+00E7 (decimal 231)
   defining Unicode char U+00E8 (decimal 232)
   defining Unicode char U+00E9 (decimal 233)
   defining Unicode char U+00EA (decimal 234)
   defining Unicode char U+00EB (decimal 235)
   defining Unicode char U+00EC (decimal 236)
   defining Unicode char U+00ED (decimal 237)
   defining Unicode char U+00EE (decimal 238)
   defining Unicode char U+00EF (decimal 239)
   defining Unicode char U+00F0 (decimal 240)
   defining Unicode char U+00F1 (decimal 241)
   defining Unicode char U+00F2 (decimal 242)
   defining Unicode char U+00F3 (decimal 243)
   defining Unicode char U+00F4 (decimal 244)
   defining Unicode char U+00F5 (decimal 245)
   defining Unicode char U+00F6 (decimal 246)
   defining Unicode char U+00F8 (decimal 248)
   defining Unicode char U+00F9 (decimal 249)
   defining Unicode char U+00FA (decimal 250)
   defining Unicode char U+00FB (decimal 251)
   defining Unicode char U+00FC (decimal 252)
   defining Unicode char U+00FD (decimal 253)
   defining Unicode char U+00FE (decimal 254)
   defining Unicode char U+00FF (decimal 255)
   defining Unicode char U+0102 (decimal 258)
   defining Unicode char U+0103 (decimal 259)
   defining Unicode char U+0104 (decimal 260)
   defining Unicode char U+0105 (decimal 261)
   defining Unicode char U+0106 (decimal 262)
   defining Unicode char U+0107 (decimal 263)
   defining Unicode char U+010C (decimal 268)
   defining Unicode char U+010D (decimal 269)
   defining Unicode char U+010E (decimal 270)
   defining Unicode char U+010F (decimal 271)
   defining Unicode char U+0110 (decimal 272)
   defining Unicode char U+0111 (decimal 273)
   defining Unicode char U+0118 (decimal 280)
   defining Unicode char U+0119 (decimal 281)
   defining Unicode char U+011A (decimal 282)
   defining Unicode char U+011B (decimal 283)
   defining Unicode char U+011E (decimal 286)
   defining Unicode char U+011F (decimal 287)
   defining Unicode char U+0130 (decimal 304)
   defining Unicode char U+0131 (decimal 305)
   defining Unicode char U+0132 (decimal 306)
   defining Unicode char U+0133 (decimal 307)
   defining Unicode char U+0139 (decimal 313)
   defining Unicode char U+013A (decimal 314)
   defining Unicode char U+013D (decimal 317)
   defining Unicode char U+013E (decimal 318)
   defining Unicode char U+0141 (decimal 321)
   defining Unicode char U+0142 (decimal 322)
   defining Unicode char U+0143 (decimal 323)
   defining Unicode char U+0144 (decimal 324)
   defining Unicode char U+0147 (decimal 327)
   defining Unicode char U+0148 (decimal 328)
   defining Unicode char U+014A (decimal 330)
   defining Unicode char U+014B (decimal 331)
   defining Unicode char U+0150 (decimal 336)
   defining Unicode char U+0151 (decimal 337)
   defining Unicode char U+0152 (decimal 338)
   defining Unicode char U+0153 (decimal 339)
   defining Unicode char U+0154 (decimal 340)
   defining Unicode char U+0155 (decimal 341)
   defining Unicode char U+0158 (decimal 344)
   defining Unicode char U+0159 (decimal 345)
   defining Unicode char U+015A (decimal 346)
   defining Unicode char U+015B (decimal 347)
   defining Unicode char U+015E (decimal 350)
   defining Unicode char U+015F (decimal 351)
   defining Unicode char U+0160 (decimal 352)
   defining Unicode char U+0161 (decimal 353)
   defining Unicode char U+0162 (decimal 354)
   defining Unicode char U+0163 (decimal 355)
   defining Unicode char U+0164 (decimal 356)
   defining Unicode char U+0165 (decimal 357)
   defining Unicode char U+016E (decimal 366)
   defining Unicode char U+016F (decimal 367)
   defining Unicode char U+0170 (decimal 368)
   defining Unicode char U+0171 (decimal 369)
   defining Unicode char U+0178 (decimal 376)
   defining Unicode char U+0179 (decimal 377)
   defining Unicode char U+017A (decimal 378)
   defining Unicode char U+017B (decimal 379)
   defining Unicode char U+017C (decimal 380)
   defining Unicode char U+017D (decimal 381)
   defining Unicode char U+017E (decimal 382)
   defining Unicode char U+200C (decimal 8204)
   defining Unicode char U+2013 (decimal 8211)
   defining Unicode char U+2014 (decimal 8212)
   defining Unicode char U+2018 (decimal 8216)
   defining Unicode char U+2019 (decimal 8217)
   defining Unicode char U+201A (decimal 8218)
   defining Unicode char U+201C (decimal 8220)
   defining Unicode char U+201D (decimal 8221)
   defining Unicode char U+201E (decimal 8222)
   defining Unicode char U+2030 (decimal 8240)
   defining Unicode char U+2031 (decimal 8241)
   defining Unicode char U+2039 (decimal 8249)
   defining Unicode char U+203A (decimal 8250)
   defining Unicode char U+2423 (decimal 9251)
)
Now handling font encoding OT1 ...
... processing UTF-8 mapping file for font encoding OT1

(c:/texlive/2012/texmf-dist/tex/latex/base/ot1enc.dfu
File: ot1enc.dfu 2008/04/05 v1.1m UTF-8 support for inputenc
   defining Unicode char U+00A1 (decimal 161)
   defining Unicode char U+00A3 (decimal 163)
   defining Unicode char U+00B8 (decimal 184)
   defining Unicode char U+00BF (decimal 191)
   defining Unicode char U+00C5 (decimal 197)
   defining Unicode char U+00C6 (decimal 198)
   defining Unicode char U+00D8 (decimal 216)
   defining Unicode char U+00DF (decimal 223)
   defining Unicode char U+00E6 (decimal 230)
   defining Unicode char U+00EC (decimal 236)
   defining Unicode char U+00ED (decimal 237)
   defining Unicode char U+00EE (decimal 238)
   defining Unicode char U+00EF (decimal 239)
   defining Unicode char U+00F8 (decimal 248)
   defining Unicode char U+0131 (decimal 305)
   defining Unicode char U+0141 (decimal 321)
   defining Unicode char U+0142 (decimal 322)
   defining Unicode char U+0152 (decimal 338)
   defining Unicode char U+0153 (decimal 339)
   defining Unicode char U+2013 (decimal 8211)
   defining Unicode char U+2014 (decimal 8212)
   defining Unicode char U+2018 (decimal 8216)
   defining Unicode char U+2019 (decimal 8217)
   defining Unicode char U+201C (decimal 8220)
   defining Unicode char U+201D (decimal 8221)
)
Now handling font encoding OMS ...
... processing UTF-8 mapping file for font encoding OMS

(c:/texlive/2012/texmf-dist/tex/latex/base/omsenc.dfu
File: omsenc.dfu 2008/04/05 v1.1m UTF-8 support for inputenc
   defining Unicode char U+00A7 (decimal 167)
   defining Unicode char U+00B6 (decimal 182)
   defining Unicode char U+00B7 (decimal 183)
   defining Unicode char U+2020 (decimal 8224)
   defining Unicode char U+2021 (decimal 8225)
   defining Unicode char U+2022 (decimal 8226)
)
Now handling font encoding OMX ...
... no UTF-8 mapping file for font encoding OMX
Now handling font encoding U ...
... no UTF-8 mapping file for font encoding U
Now handling font encoding PD1 ...
... no UTF-8 mapping file for font encoding PD1
   defining Unicode char U+00A9 (decimal 169)
   defining Unicode char U+00AA (decimal 170)
   defining Unicode char U+00AE (decimal 174)
   defining Unicode char U+00BA (decimal 186)
   defining Unicode char U+02C6 (decimal 710)
   defining Unicode char U+02DC (decimal 732)
   defining Unicode char U+200C (decimal 8204)
   defining Unicode char U+2026 (decimal 8230)
   defining Unicode char U+2122 (decimal 8482)
   defining Unicode char U+2423 (decimal 9251)
))
(c:/texlive/2012/texmf-dist/tex/latex/base/fontenc.sty
Package: fontenc 2005/09/27 v1.99g Standard LaTeX package

(c:/texlive/2012/texmf-dist/tex/latex/base/t1enc.def
File: t1enc.def 2005/09/27 v1.99g Standard LaTeX file
LaTeX Font Info:    Redeclaring font encoding T1 on input line 43.
))
(c:/texlive/2012/texmf-dist/tex/latex/units/units.sty
Package: units 1998/08/04 v0.9b Typesetting units

(c:/texlive/2012/texmf-dist/tex/latex/units/nicefrac.sty
Package: nicefrac 1998/08/04 v0.9b Nice fractions
\L@UnitsRaiseDisplaystyle=\skip63
\L@UnitsRaiseTextstyle=\skip64
\L@UnitsRaiseScriptstyle=\skip65
))
(c:/texlive/2012/texmf-dist/tex/latex/subfigure/subfigure.sty
Package: subfigure 2002/03/15 v2.1.5 subfigure package
\subfigtopskip=\skip66
\subfigcapskip=\skip67
\subfigcaptopadj=\dimen146
\subfigbottomskip=\skip68
\subfigcapmargin=\dimen147
\subfiglabelskip=\skip69
\c@subfigure=\count128
\c@lofdepth=\count129
\c@subtable=\count130
\c@lotdepth=\count131

****************************************
* Local config file subfigure.cfg used *
****************************************
(c:/texlive/2012/texmf-dist/tex/latex/subfigure/subfigure.cfg)
\subfig@top=\skip70
\subfig@bottom=\skip71
)
No file metabolites-80755-supplementary-final.aux.
\openout1 = `metabolites-80755-supplementary-final.aux'.

LaTeX Font Info:    Checking defaults for OML/cmm/m/it on input line 125.
LaTeX Font Info:    ... okay on input line 125.
LaTeX Font Info:    Checking defaults for T1/cmr/m/n on input line 125.
LaTeX Font Info:    ... okay on input line 125.
LaTeX Font Info:    Checking defaults for OT1/cmr/m/n on input line 125.
LaTeX Font Info:    ... okay on input line 125.
LaTeX Font Info:    Checking defaults for OMS/cmsy/m/n on input line 125.
LaTeX Font Info:    ... okay on input line 125.
LaTeX Font Info:    Checking defaults for OMX/cmex/m/n on input line 125.
LaTeX Font Info:    ... okay on input line 125.
LaTeX Font Info:    Checking defaults for U/cmr/m/n on input line 125.
LaTeX Font Info:    ... okay on input line 125.
LaTeX Font Info:    Checking defaults for PD1/pdf/m/n on input line 125.
LaTeX Font Info:    ... okay on input line 125.
LaTeX Font Info:    Try loading font information for T1+ptm on input line 125.
(c:/texlive/2012/texmf-dist/tex/latex/psnfss/t1ptm.fd
File: t1ptm.fd 2001/06/04 font definitions for T1/ptm.
)
(c:/texlive/2012/texmf-dist/tex/context/base/supp-pdf.mkii
[Loading MPS to PDF converter (version 2006.09.02).]
\scratchcounter=\count132
\scratchdimen=\dimen148
\scratchbox=\box32
\nofMPsegments=\count133
\nofMParguments=\count134
\everyMPshowfont=\toks29
\MPscratchCnt=\count135
\MPscratchDim=\dimen149
\MPnumerator=\count136
\makeMPintoPDFobject=\count137
\everyMPtoPDFconversion=\toks30
) (c:/texlive/2012/texmf-dist/tex/latex/oberdiek/epstopdf-base.sty
Package: epstopdf-base 2010/02/09 v2.5 Base part for package epstopdf

(c:/texlive/2012/texmf-dist/tex/latex/oberdiek/grfext.sty
Package: grfext 2010/08/19 v1.1 Manage graphics extensions (HO)
)
Package grfext Info: Graphics extension search list:
(grfext)             [.png,.pdf,.jpg,.mps,.jpeg,.jbig2,.jb2,.PNG,.PDF,.JPG,.JPE
G,.JBIG2,.JB2,.eps]
(grfext)             \AppendGraphicsExtensions on input line 452.

(c:/texlive/2012/texmf-dist/tex/latex/latexconfig/epstopdf-sys.cfg
File: epstopdf-sys.cfg 2010/07/13 v1.3 Configuration of (r)epstopdf for TeX Liv
e
))
Package lastpage Info: Please have a look at the pageslts package at
(lastpage)             http://www.ctan.org/tex-archive/ 
(lastpage)             macros/latex/contrib/pageslts/ 
(lastpage)             or
(lastpage)             http://www.ctan.org/tex-archive/ 
(lastpage)             install/macros/latex/contrib/pageslts.tds.zip
(lastpage)             ! on input line 125.
Package caption Info: Begin \AtBeginDocument code.
Package caption Info: hyperref package is loaded.
Package caption Info: rotating package is loaded.
Package caption Info: subfigure package is loaded.
Package caption Info: End \AtBeginDocument code.
\AtBeginShipoutBox=\box33
Package hyperref Info: Link coloring ON on input line 125.

(c:/texlive/2012/texmf-dist/tex/latex/hyperref/nameref.sty
Package: nameref 2010/04/30 v2.40 Cross-referencing by name of section

(c:/texlive/2012/texmf-dist/tex/generic/oberdiek/gettitlestring.sty
Package: gettitlestring 2010/12/03 v1.4 Cleanup title references (HO)
)
\c@section@level=\count138
)
LaTeX Info: Redefining \ref on input line 125.
LaTeX Info: Redefining \pageref on input line 125.
LaTeX Info: Redefining \nameref on input line 125.
\@outlinefile=\write3
\openout3 = `metabolites-80755-supplementary-final.out'.

LaTeX Font Info:    Font shape `T1/ptm/bx/n' in size <12> not available
(Font)              Font shape `T1/ptm/b/n' tried instead on input line 125.


LaTeX Warning: Reference `tab:health' on page 1 undefined on input line 128.


LaTeX Warning: Reference `tab:smoker' on page 1 undefined on input line 128.

LaTeX Font Info:    Try loading font information for U+msa on input line 132.
(c:/texlive/2012/texmf-dist/tex/latex/amsfonts/umsa.fd
File: umsa.fd 2009/06/22 v3.00 AMS symbols A
)
LaTeX Font Info:    Try loading font information for U+msb on input line 132.

(c:/texlive/2012/texmf-dist/tex/latex/amsfonts/umsb.fd
File: umsb.fd 2009/06/22 v3.00 AMS symbols B
)
LaTeX Font Info:    Try loading font information for OMS+ptm on input line 192.


(c:/texlive/2012/texmf-dist/tex/latex/psnfss/omsptm.fd
File: omsptm.fd 
)
LaTeX Font Info:    Font shape `OMS/ptm/m/n' in size <12> not available
(Font)              Font shape `OMS/cmsy/m/n' tried instead on input line 192.
 [1

{c:/texlive/2012/texmf-var/fonts/map/pdftex/updmap/pdftex.map}]
<figures/fmeasureCOPDALL.png, id=16, 3232.878pt x 2498.936pt>
File: figures/fmeasureCOPDALL.png Graphic file (type png)

<use figures/fmeasureCOPDALL.png>
Package pdftex.def Info: figures/fmeasureCOPDALL.png used on input line 206.
(pdftex.def)             Requested size: 398.34009pt x 307.90495pt.


Package lastpage Warning: Rerun to get the references right on input line 211.


AED: lastpage setting LastPage

Package Fancyhdr Warning: \headheight is too small (8.5pt): 
 Make it at least 14.49998pt.
 We now make it that large for the rest of the document.
 This may cause the page layout to be inconsistent, however.

[2 <./figures/fmeasureCOPDALL.png>]
Package atveryend Info: Empty hook `BeforeClearDocument' on input line 211.
Package atveryend Info: Empty hook `AfterLastShipout' on input line 211.

(./metabolites-80755-supplementary-final.aux)
Package atveryend Info: Executing hook `AtVeryEndDocument' on input line 211.
Package atveryend Info: Executing hook `AtEndAfterFileList' on input line 211.


Package rerunfilecheck Warning: File `metabolites-80755-supplementary-final.out
' has changed.
(rerunfilecheck)                Rerun to get outlines right
(rerunfilecheck)                or use package `bookmark'.

Package rerunfilecheck Info: Checksums for `metabolites-80755-supplementary-fin
al.out':
(rerunfilecheck)             Before: <no file>
(rerunfilecheck)             After:  42D930583219DBF7A92B6B0C11BE6CEC;220.

LaTeX Warning: There were undefined references.


LaTeX Warning: Label(s) may have changed. Rerun to get cross-references right.

Package atveryend Info: Empty hook `AtVeryVeryEnd' on input line 211.
 ) 
Here is how much of TeX's memory you used:
 8783 strings out of 493488
 125480 string characters out of 3144748
 233284 words of memory out of 3000000
 11931 multiletter control sequences out of 15000+200000
 16248 words of font info for 38 fonts, out of 3000000 for 9000
 957 hyphenation exceptions out of 8191
 43i,11n,45p,1249b,388s stack positions out of 5000i,500n,10000p,200000b,50000s
{c:/texlive/2012/texmf-dist/fonts/enc/dvips/base/8r.enc}<c:/texlive/2012/texm
f-dist/fonts/type1/public/amsfonts/cm/cmex10.pfb><c:/texlive/2012/texmf-dist/fo
nts/type1/public/amsfonts/cm/cmmi12.pfb><c:/texlive/2012/texmf-dist/fonts/type1
/public/amsfonts/cm/cmmi6.pfb><c:/texlive/2012/texmf-dist/fonts/type1/public/am
sfonts/cm/cmmi8.pfb><c:/texlive/2012/texmf-dist/fonts/type1/public/amsfonts/cm/
cmr12.pfb><c:/texlive/2012/texmf-dist/fonts/type1/public/amsfonts/cm/cmr6.pfb><
c:/texlive/2012/texmf-dist/fonts/type1/public/amsfonts/cm/cmr8.pfb><c:/texlive/
2012/texmf-dist/fonts/type1/public/amsfonts/cm/cmsy10.pfb><c:/texlive/2012/texm
f-dist/fonts/type1/public/amsfonts/cm/cmsy6.pfb><c:/texlive/2012/texmf-dist/fon
ts/type1/public/amsfonts/cm/cmsy8.pfb><c:/texlive/2012/texmf-dist/fonts/type1/u
rw/times/utmb8a.pfb><c:/texlive/2012/texmf-dist/fonts/type1/urw/times/utmr8a.pf
b>
Output written on metabolites-80755-supplementary-final.pdf (2 pages, 2404527 b
ytes).
PDF statistics:
 78 PDF objects out of 1000 (max. 8388607)
 59 compressed objects within 1 object stream
 10 named destinations out of 1000 (max. 500000)
 6 words of extra memory for PDF output out of 10000 (max. 10000000)
