# Supplementary material for: Carotta: Revealing Hidden Confounder Markers in Metabolic Breath Profiles
Source: Metabolites. 2015 Jun 10;5(2):344–63. doi: 10.3390/metabo5020344 (PMC4495376; doi:10.3390/metabo5020344)
Supplement: Supplementary File 1 [file metabolites-05-00344-s001.zip › metabolites-80755-supplementary-final/metabolites-80755-supplementary-final.out]

\BOOKMARK [1][]{section.1}{Artificial Data Set Generation}{}% 1
\BOOKMARK [1][]{section.2}{Agglomerative Methods for HAC}{}% 2
\BOOKMARK [1][]{section.3}{F-Measure of the 14 Metabolite Subsets in the COPD Data Set}{}% 3
