# Supplementary material for: Carotta: Revealing Hidden Confounder Markers in Metabolic Breath Profiles
Source: Metabolites. 2015 Jun 10;5(2):344–63. doi: 10.3390/metabo5020344 (PMC4495376; doi:10.3390/metabo5020344)
Supplement: Supplementary File 1 [file metabolites-05-00344-s001.zip › metabolites-80755-supplementary-final/metabolites-80755-supplementary-final.tex]

%  LaTeX support: e-mail latex@mdpi.com
%
%  In case you need support, please attach any log files that you could
%  have, and specify the details of your LaTeX setup (which operating
%  system and LaTeX version / tools you are using).
%==========================================================
% LaTeX Class File and Rendering Mode (choose one)
%----------------------------------------------------------
% you will need to save "mdpi.cls" and "mdpi.bst" files
% into the same folder as the this template file.
%----------------------------------------------------------
\documentclass[journal,supfile,accept,moreauthors,pdftex,12pt,a4paper]{mdpi} % for use with pdfLaTeX only
%\documentclass[journal,supfile,submit,moreauthors,dvipdfm,12pt,a4paper]{mdpi} % if eps figure are used, use this line with LaTeX and dvi2pdf only
%=================================================================
% Class Options
%-----------------------------------------------------------------
%As first class option the journal should be set. Choose between:
%administrativesciences, algorithms, atmosphere, cancers, challenges, diversity, energies, entropy, forests, futureinternet, games, genes, information, ijerph, ijms, jfb, jlpea, marinedrugs, materials, micromachines,
%molbank,  molecules, nutrients, pharmaceuticals, pharmaceutics , polymers, religions, remotesensing, sensors, sustainability, symmetry, toxins, viruses, water
%
%-----------------------------------------------------------------
% The default type of manuscript is article, but could be replaced
% by using one of the class options:
% article, review, communication, commentary, letter, bookreview,
% correction, addendum, editorial.
%-----------------------------------------------------------------
% If there is only one author the class opting oneauthor should be
% used. Otherwise use the class option moreauthors .
%-----------------------------------------------------------------
% The class option submit will be changed to accept by the Editorial
% Office when the paper is accepted.
% This will only make changes to the frontpage, the headings and
% the copyright information
% Journal Info and Pagination for Accepted Papers will also be
% assigned by the Editorial
%-----------------------------------------------------------------
\setcounter{page}{1}
\lastpage{x}
\doinum{10.3390/------}
\pubvolume{xx}
\pubyear{2012}
\history{Received: xx / Accepted: xx / Published: xx}

%-----------------------------------------------------------------
% The following line should be uncommented if the LaTeX file
% is uploaded to arXiv.org
%\pdfoutput=1
%=================================================================
%=================================================================
% Add packages and commands to include here
% The hyperref, caption, float and color packages are already included
%-----------------------------------------------------------------
%\usepackage{amssymb,amsmath}
%\usepackage{graphicx}
%\usepackage{subfigure,psfig}
%-----------------------------------------------------------------

%%if a new title should be changed for the supplemenatary file template, decomment
%\renewcommand{\header}{%
%  \thispagestyle{empty}
%  \begin{flushleft}
%    \vspace{-50pt}
%    \textbf{New Title}
%  \end{flushleft}
%}
\graphicspath{{fig/}}
\usepackage{amssymb,amsmath} 
\usepackage{graphicx}
\usepackage{epsfig}
\usepackage{color}
\usepackage{rotating}
\usepackage{multirow,booktabs}
\usepackage[utf8]{inputenc}
\usepackage[T1]{fontenc}
\usepackage{units}
\usepackage{subfigure}
\makeatletter
\renewcommand{\@thesubfigure}{\normalsize(\textbf{\alph{subfigure}})}
\makeatother

\pagestyle{fancy}
%\lhead{\emph{Molecules} \textbf{2014}, \emph{3}}
\chead{}
\rhead{\bfseries  S\thepage} 
\lfoot{}
\cfoot{}
\rfoot{}
\renewcommand{\headrulewidth}{0pt}
\renewcommand{\theequation}{S\arabic{equation}} %adds a 'S' in front of all equation enumerations
\renewcommand{\thefigure}{S\arabic{figure}}  %adds a 'S' in front of all figure enumerations
\renewcommand{\thetable}{S\arabic{table}}  %adds a 'S' in front of all table enumerations

% Full title of the paper (Capitalized)
\Title{Carotta - Revealing hidden confounder markers in metabolic breath profiles}

% Authors (add full first names)
\Author{Anne-Christin Hauschild$^{1,2 \oplus}$, Tobias Frisch$^{1,3\oplus}$, J{\"o}rg Ingo Baumbach$^{4}$, Jan Baumbach$^{2}$}

% Affiliations / Addresses, add [1] after \address if there is only one affiliation
\address{$^{1}$ \small Computational Systems Biology Group, Max Planck Institute for Informatics, Saarbr{\"u}cken, Germany\\

$^{2}$ \small Computational Biology group, Department of Mathematics and Computer Science, University of Southern Denmark, Odense, Denmark\\

$^{3}$ \small Department of Mathematics and Computer Science, Freie Universit{\"a}t Berlin, Berlin; Germany\\
 
 $^{4}$ \small Faculty of Applied Chemistry, Reutlingen University, Reutlingen; Germany\\
 $^{\oplus}$ \small Shared first author.\\}

%Contact information of the corresponding author, add [2] after \corres if there are more than one corresponding author
\corres{E-Mail, Tel. and Fax number of the corresponding author.}

% Abstract
\abstract{This is the abstract section. The abstract should be one section and count less than 100 words.}

% Keywords: add 3 to 10 keywords
\keyword{keyword; keyword; keyword}

\newcommand{\beginsupplement}{%
        \setcounter{table}{0}
        \renewcommand{\thetable}{S\arabic{table}}%
        \setcounter{figure}{0}
        \renewcommand{\thefigure}{S\arabic{figure}}%
     }

\begin{document}
\section{Artificial Data Set Generation}

The artificial dataset is dedicated to demonstrate and clarify the capabilities of Carotta. It consists of 16 samples and 12 metabolites associated to three metabolite groups. Each of these groups is related to one of the three predefined labels of the samples: (1) ``health'' (values: healthy (5), disease subtype 1 (5), disease subtype 2 (6)); (2) ``smoking'' (values: Smoker (9), Non-Smoker(7)); (3) ``nutrition'' (values: Apple Juice (4), Tee (4), Orange Juice (4), Coffee (4)). The following Tables \ref{tab:health}--\ref{tab:smoker} show the corresponding mean and standard deviations used to generate normal distributions from which the artificial data set was sampled.
	\begin{table}[H]
		\centering
		
		\begin{tabular}{ccccc}
			\toprule
			\textbf{Metabolite} & \textbf{Healthy} & \textbf{Subtype 1} & \textbf{Subtype 2} & \textbf{Standard deviation}\\
			\midrule
			Metabolite 1 & 1 & 4 & 3 & 0.25 \\

			Metabolite 2 & 3 & 6 & 5 & 0.1 \\

			Metabolite 3 & 6 & 9 & 8 & 0.5 \\

			Metabolite 4 & 0 & 3 & 2 & 0.7 \\
			\bottomrule
		\end{tabular}
		\caption{Distribution of metabolite expression mean intensities and their variance (standard deviation) for artificial patients with class label ``Health''.}
		\label{tab:health}
	\end{table}

	\begin{table}[H]
		\centering
		\begin{tabular}{cccccc}
			\toprule
			\textbf{Metabolite} & \textbf{Orange Juice} & \textbf{Apple Juice} & \textbf{Tee} & \textbf{Coffee} & \textbf{Standard deviation} \\
			\midrule
			Metabolite 1 & 0 & 2 & 4 & 6 & 1 \\

			Metabolite 2 & 2 & 4 & 6 & 8 & 1 \\

			Metabolite 3 & 5 & 7 & 9 & 11 & 0.5 \\
	
			Metabolite 4 & $-$1 & 1 & 3 & 5 & 0.75 \\
			\bottomrule
		\end{tabular}
		\caption{Distribution of metabolite expression mean intensities and their variance (standard deviation) for artificial patients with class label ``Nutrition''.}
		\label{tab:nutrition}
	\end{table}


	\begin{table}[H]
		\centering
		\begin{tabular}{cccc}
			\toprule
			\textbf{Metabolite} & \textbf{Non-Smoker} & \textbf{Smoker} & \textbf{Standard deviation} \\
			\midrule
			Metabolite 1 & $-$1 & 5 & 1 \\
		
			Metabolite 2 & 1 & 7 & 1 \\
		
			Metabolite 3 & 2 & 8 & 2 \\
		
			Metabolite 4 & $-$2 & 4 & 0.7 \\
			\bottomrule
		\end{tabular}
		\caption{Distribution of metabolite expression mean intensities and their variance (standard deviation) for artificial patients with class label ``Smoking''.}
		\label{tab:smoker}
	\end{table}


\section{Agglomerative Methods for HAC}
	\begin{itemize}
		\item \textbf{Complete-linkage:} Here the elements with the maximum distance are used:\\ $D = \max\limits_{x,y} d(x,y)$
		\item \textbf{Single-linkage:} It is known as ``nearest neighbour clustering'' because the two elements with the smallest distances are used:\\ $D = \min\limits_{x,y} d(x,y)$
		\item \textbf{Ward-linkage:} We define $\bar{X}, \bar{Y}$ as the centre of the clusters $X$ and $Y$. This distance tries to minimise the variance within the clusters. It tends to build clusters with equal size.\\ $ D = \frac{d(\bar{X}, \bar{Y})}{ \frac{1}{|X|} + \frac{1}{|Y|} } $
		\item \textbf{Average-linkage:} Here we use the average distance of all objects. \\ $ \frac{1}{|X||Y|} \sum\limits_{X,Y} d(x,y) $
%			\item \textbf{Median-linkage:} 
		\item \textbf{Centroid-linkage:} This method uses the distance between the centroids of both clusters.
	\end{itemize}
	
			

\section{F-Measure of the 14 Metabolite Subsets in the COPD Data Set}

\begin{figure}[H]
	\centering
	\includegraphics[width=0.8\linewidth]{figures/fmeasureCOPDALL.png}
	\caption{Comparison of the clustering results of the 14 metabolite clusters. The plot shows the F-measure for different clustering thresholds computed against the disease annotation (COPD, COPD with BC, and healthy). Given three groups of patients in the annotation, we are particularly interested in the performance at clustering results at $T~3$ (x-axis).}
	\label{fig:fmeasureCOPD}
\end{figure}			
			 
\end{document}
